# Supplementary material for: In silico analysis of the core signaling proteome from the barley powdery mildew pathogen (Blumeria graminis f.sp. hordei)
Source: PubMed Central journal article supplement (PMC4195978; doi:10.1186/1471-2164-15-843), 2014-10-02

# Additional Figure 1

**A**

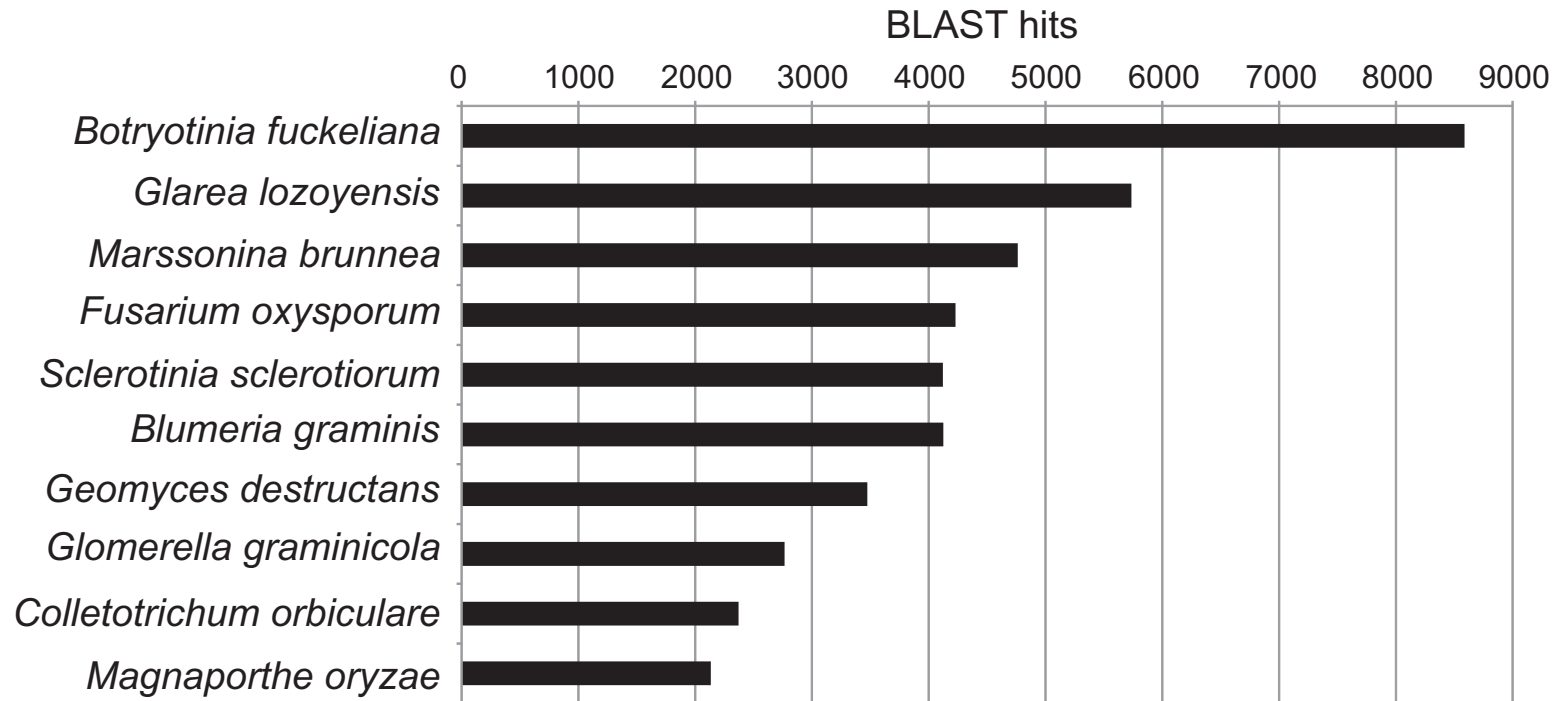

**B**

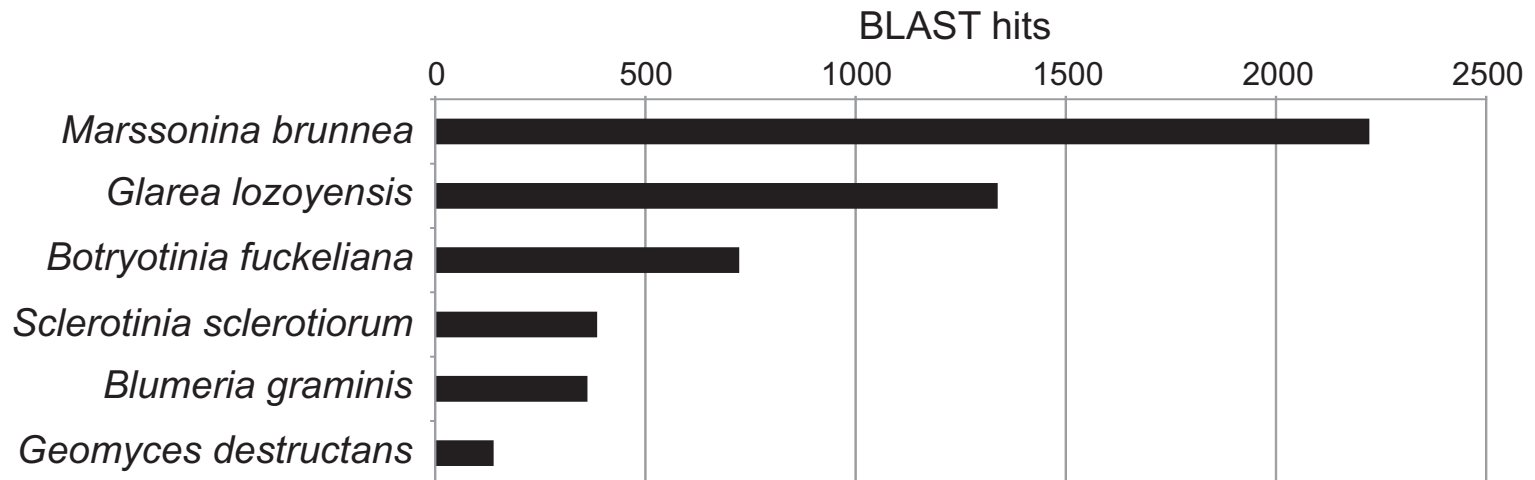

Supplement: 12864_2014_6527_MOESM2_ESM.pdf [file 12864_2014_6527_MOESM2_ESM.pdf]
