# Supplementary material for: In silico analysis of the core signaling proteome from the barley powdery mildew pathogen (Blumeria graminis f.sp. hordei)
Source: PubMed Central journal article supplement (PMC4195978; doi:10.1186/1471-2164-15-843), 2014-10-02
Supplement: 12864_2014_6527_MOESM3_ESM.pdf [file 12864_2014_6527_MOESM3_ESM.pdf]

**Additional file 3: Table S2. *Bgh* protein family size distribution.**

---

| <b>Family size (number of proteins)</b> | <b>Frequency (number of families)</b> |
|-----------------------------------------|---------------------------------------|
| 1                                       | 3,758                                 |
| 2                                       | 314                                   |
| 3                                       | 141                                   |
| 4                                       | 61                                    |
| 5                                       | 28                                    |
| 6                                       | 19                                    |
| 7                                       | 14                                    |
| 8                                       | 12                                    |
| 9                                       | 3                                     |
| 10                                      | 6                                     |
| 11-25                                   | 14                                    |
| 26-50                                   | 2                                     |
| 51-100                                  | 3                                     |
| >100                                    | 2                                     |

---
