# Supplementary material for: In silico analysis of the core signaling proteome from the barley powdery mildew pathogen (Blumeria graminis f.sp. hordei)
Source: PubMed Central journal article supplement (PMC4195978; doi:10.1186/1471-2164-15-843), 2014-10-02
Supplement: 12864_2014_6527_MOESM6_ESM.pdf [file 12864_2014_6527_MOESM6_ESM.pdf]

**Additional file 6: Table S4. Presence of a fungus-specific kinase family in selected fungal species <sup>a</sup>**

| <b>Species</b>                                                    | <b>Ascomycete class</b> | <b>Fungal lifestyle</b>                             | <b>Number of hits (E value &lt;1e-20) (stringent)</b> | <b>Number of hits (E value &lt;1e-05) (relaxed)</b> |
|-------------------------------------------------------------------|-------------------------|-----------------------------------------------------|-------------------------------------------------------|-----------------------------------------------------|
| <i>Blumeria graminis</i> f.sp. <i>hordei</i> DH14 (taxid: 546991) | Leotiomycetes           | Phytopathogen (powdery mildew)                      | 62                                                    | 70                                                  |
| <i>Blumeria graminis</i> f.sp. <i>tritici</i> (taxid 62690)       | Leotiomycetes           | Phytopathogen (powdery mildew)                      | 19                                                    | 25                                                  |
| <i>Coccidioides immitis</i> RS (taxid:246410)                     | Eurotiomycetes          | Facultative human pathogen (coccidioidomycosis)     | 18                                                    | 26                                                  |
| <i>Claviceps purpurea</i> 20.1 (taxid:1111077)                    | Sordariomycetes         | Phytopathogen (ergot)                               | 13                                                    | 28                                                  |
| <i>Ajellomyces dermatitidis</i> ATCC 18188 (taxid: 653446)        | Eurotiomycetes          | Facultative human pathogen (blastomycosis)          | 11                                                    | 17                                                  |
| <i>Paracoccidioides brasiliensis</i> Pb18 (taxid:502780)          | Eurotiomycetes          | Facultative human pathogen (paracoccidioidomycosis) | 11                                                    | 16                                                  |

|                                                                  |                 |                                 |   |    |
|------------------------------------------------------------------|-----------------|---------------------------------|---|----|
| <i>Macrophomina phaseolina</i> MS6<br>(taxid:1126212)            | Dothideomycetes | Phytopathogen (charcoal rot)    | 8 | 9  |
| <i>Metarhizium acridum</i> CQMa 102<br>(taxid:655827)            | Sordariomycetes | Entomopathogen (grasshopper)    | 6 | 10 |
| <i>Ajellomyces capsulatus</i> H143<br>(taxid:544712)             | Eurotiomycetes  | Human pathogen (histoplasmosis) | 5 | 10 |
| <i>Metarhizium anisopliae</i> ARSEF 23<br>(taxid:655844)         | Sordariomycetes | Entomopathogen                  | 5 | 7  |
| <i>Sclerotinia sclerotiorum</i> 1980<br>(taxid:665079)           | Leotiomycetes   | Phytopathogen                   | 4 | 6  |
| <i>Beauveria bassiana</i> ARSEF2860<br>(taxid:655819)            | Sordariomycetes | Entomopathogen                  | 4 | 5  |
| <i>Glarea lozoyensis</i> ATCC 20868<br>(taxid:1116229)           | Leotiomycetes   |                                 | 1 | 1  |
| <i>Neurospora crassa</i> OR74A<br>(taxid:367110)                 | Sordariomycetes | Saprophyte                      | 1 | 1  |
| <i>Fusarium oxysporum</i> f. sp. <i>cubense</i><br>(taxid:61366) | Sordariomycetes | Phytopathogen                   | 0 | 2  |
| <i>Aspergillus niger</i> ATCC 1015                               | Eurotiomycetes  | Saprophyte                      | 0 | 2  |

(taxid:380704)

|                                                                    |                 |                                      |   |   |
|--------------------------------------------------------------------|-----------------|--------------------------------------|---|---|
| <i>Magnaporthe oryzae</i> 70-15 (taxid: 242507)                    | Sordariomycetes | Phytopathogen (rice blast)           | 0 | 0 |
| <i>Erysiphe pisi</i>                                               | Leotiomycetes   | Phytopathogen (powdery mildew)       | 1 | 0 |
| <i>Golovinomyces orontii</i>                                       | Leotiomycetes   | Phytopathogen (powdery mildew)       | 0 | 1 |
| <i>Saccharomyces cerevisiae</i> (taxid: 4932)                      | Saccharomycetes | Saprophyte                           | 0 | 0 |
| <i>Colletotrichum higginsianum</i> (taxid:80884)                   | Sordariomycetes | Phytopathogen (anthracnose)          | 0 | 0 |
| <i>Botryotinia fuckeliana</i> T4 (taxid:999810)                    | Leotiomycetes   | Phytopathogen (gray mold)            | 0 | 0 |
| <i>Penicillium chrysogenum</i> NCPC10086 (taxid:1297591)           | Eurotiomycetes  | Saprophyte                           | 0 | 0 |
| <i>Marssonina brunnea</i> f. sp. 'multigermtub' S1 (taxid:1072389) | Leotiomycetes   | Phytopathogen (Marssonina leaf spot) | 0 | 0 |
| <i>Stagonospora nodorum</i> (taxid:13684)                          | Dothideomycetes | Phytopathogen (blotch)               | 0 | 0 |

---

<sup>a</sup> Based on BLASTP results using CCU82254 as a query sequence.
